# Supplementary material for: Development of Saturated Fat Replacers: Conventional and Nano-Emulsions Stabilised by Lecithin and Hydroxylpropyl Methylcellulose
Source: MDPI journal article supplement (doi:10.3390/foods11162536), 2022-08-22
Supplement: s1 [file s1]

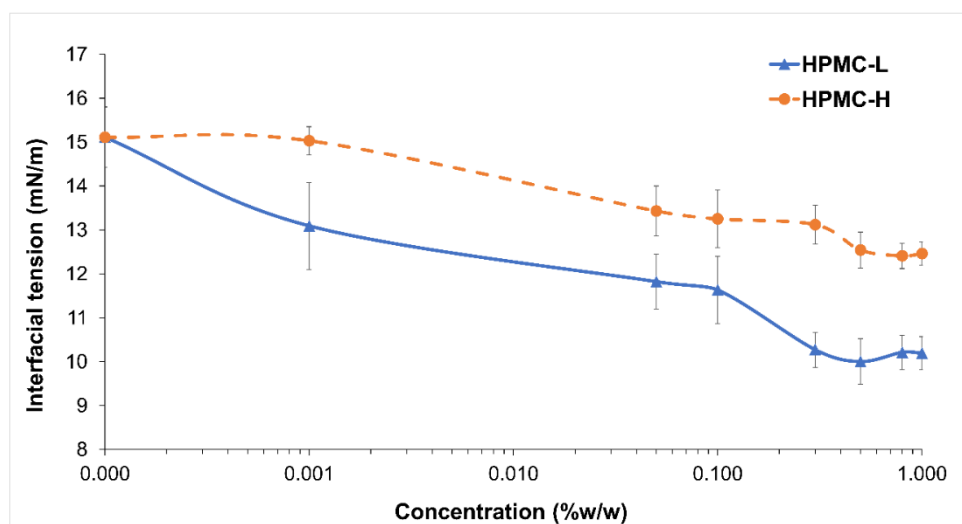

**Figure S1.** Characterisation interfacial tension of HPMC-L and HPMC-H.

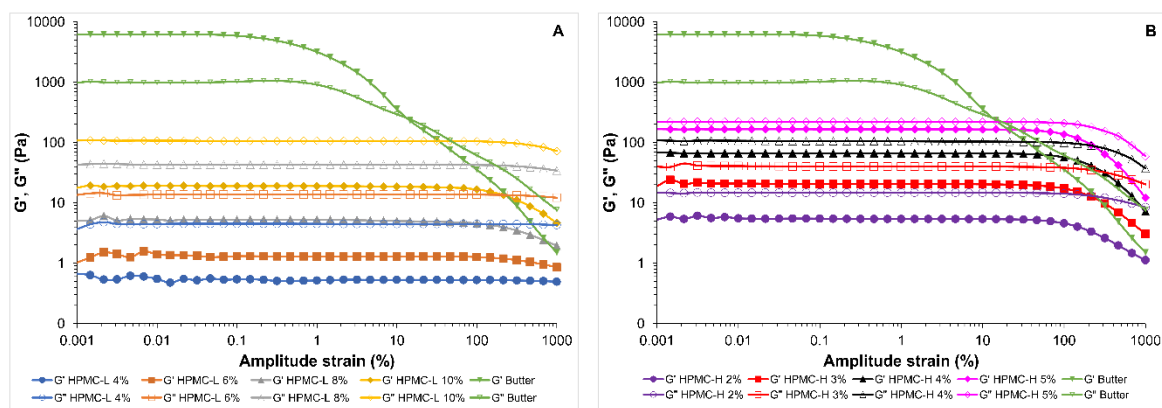

**Figure S2.**  $G'$  and  $G''$  moduli of HPMC solutions and butter as a function of amplitude. A) HPMC-L solutions at different concentrations (4% blue circles; 6% orange squares; 8% grey triangles; 10% yellow diamond) and butter (green down-pointing triangle). B) HPMC-H solutions at different concentrations (2% purple circles; 3% red squares; 4% pink triangles; 5% black diamond) and butter (green down-pointing triangle). Filled symbols correspond to storage modulus ( $G'$ ) and open symbols to loss modulus ( $G''$ ).

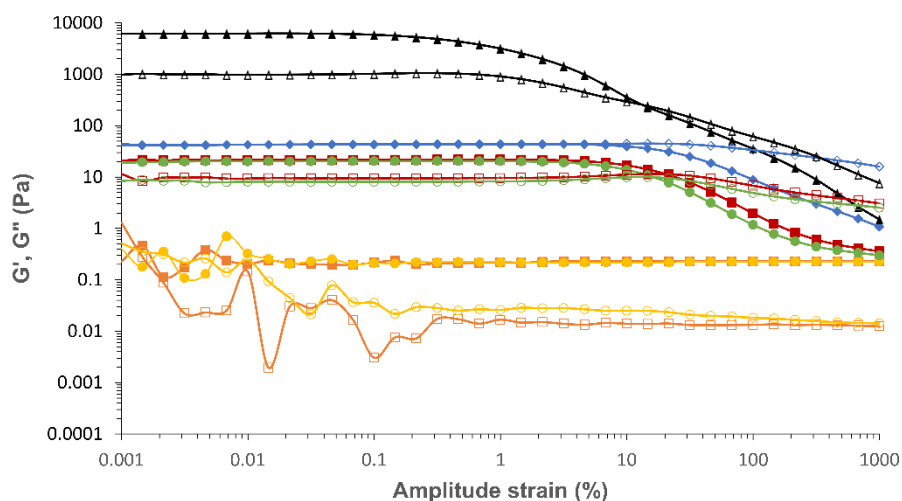

**Figure S3.** Dynamic moduli as a function of amplitude of emulsions and butter ▲. Conventional emulsion (CE-0 ■; CE-2 ■; CE-4 ◆). Nanoemulsion (NE-0 ●; NE-2 ●). Filled symbols correspond to elastic modulus ( $G'$ ) and open symbols to viscous modulus ( $G''$ ).

**Table S1.** MDD and PDI of conventional (CE) and nanoemulsion (NE) stabilised with lecithin and HMPC (0%, 2% and 4%).

| Emulsions | MDD (nm)                   | PDI                        |
|-----------|----------------------------|----------------------------|
| CE-0      | 220.13 <sup>c</sup> (2.22) | 0.313 <sup>a</sup> (0.030) |
| CE-2      | 257.51 <sup>b</sup> (5.26) | 0.356 <sup>a</sup> (0.063) |
| CE-4      | 275.01 <sup>a</sup> (6.78) | 0.346 <sup>a</sup> (0.035) |
| NE-0      | 185.83 <sup>e</sup> (4.52) | 0.230 <sup>b</sup> (0.018) |
| NE-2      | 192.08 <sup>d</sup> (3.93) | 0.255 <sup>b</sup> (0.013) |

Indicated values are reported as means (standard deviation). Values with the different superscript letters are significantly different ( $p < 0.05$ ) between samples in the same column.
